# Supplementary material for: Drosophila insulin-like peptide 2 mediates dietary regulation of sleep intensity
Source: PubMed Central journal article supplement (PMC7089559; doi:10.1371/journal.pgen.1008270), 2020-03-11

**A** *w<sup>1118</sup>* Males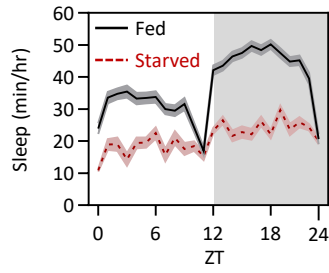**B**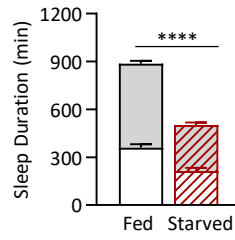**C**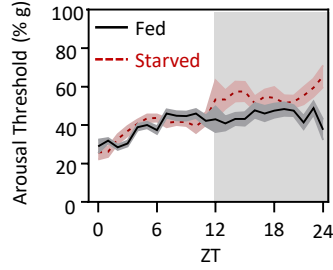**D**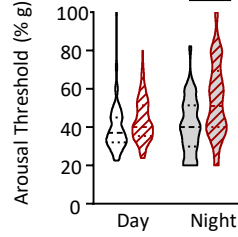**E** Canton-S Females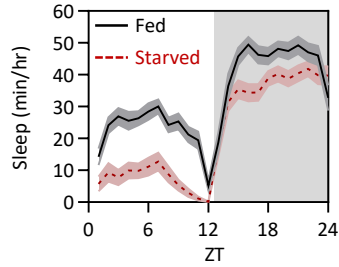**F**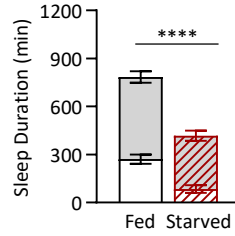**G**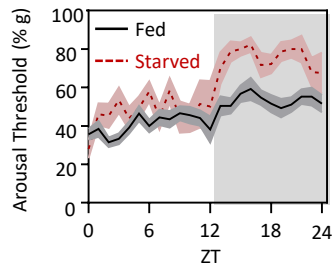**H**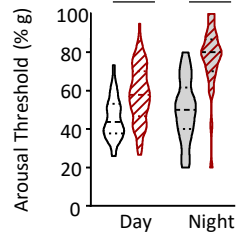

Supplement: pgen.1008270.s003.pdf [file pgen.1008270.s003.pdf]
