# Supplementary material for: Drosophila insulin-like peptide 2 mediates dietary regulation of sleep intensity
Source: PubMed Central journal article supplement (PMC7089559; doi:10.1371/journal.pgen.1008270), 2020-03-11

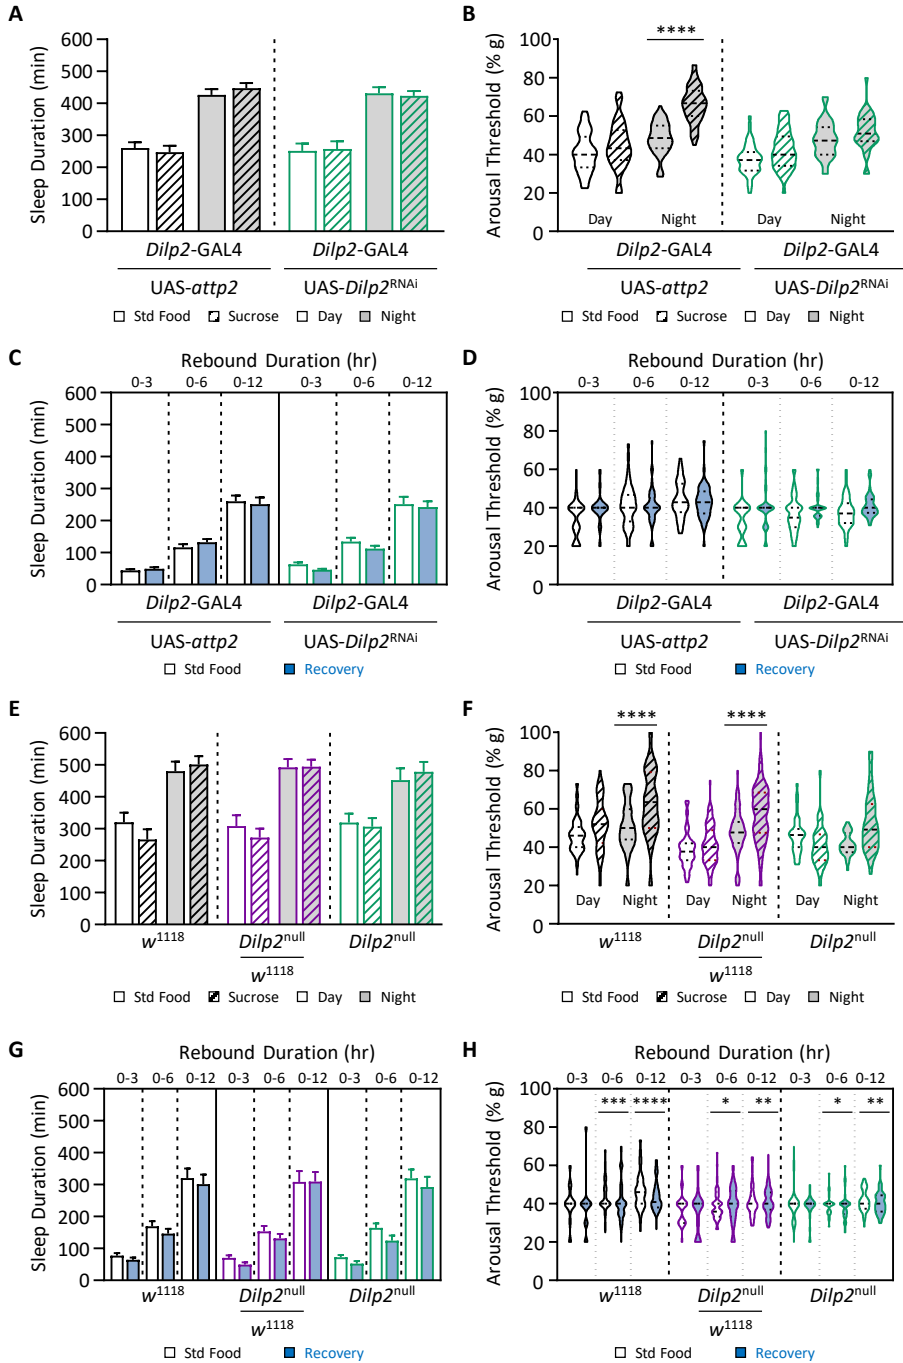

Supplement: pgen.1008270.s007.pdf [file pgen.1008270.s007.pdf]
